# Supplementary material
Source: Springer Nature journal article supplement (https://www.springermedizin.de/resource/supplementary/13023_2014_750_MOESM13_ESM.pdf/9642974)

**A**Relative % DNA  
methylation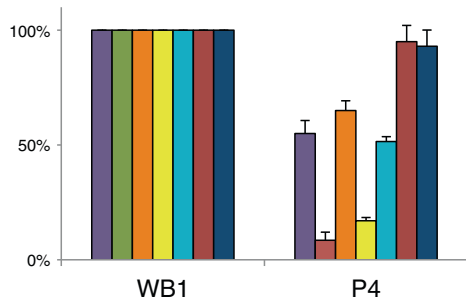**B**Relative % DNA  
methylation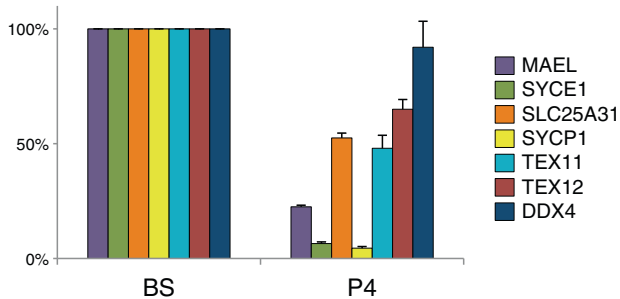**C**Relative fold change  
in gene expression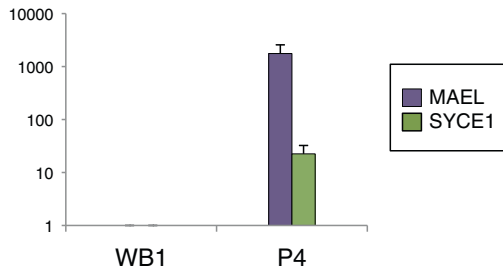

Supplement: MOESM13 [file 9642974]
